# Supplementary material for: Simplified regimen for the management of hypertension with telemedicine and blood pressure self-monitoring (SIMPLE): study protocol for a randomised controlled trial
Source: HighWire-hosted journal article supplement (doi:10.1136/bmjopen-2021-049162), 2022-03-01
Supplement: bmjopen-2021-049162supp002_data_supplement.pdf [file bmjopen-2021-049162supp002_data_supplement.pdf]

**Table S1. Previous regimen exchange plan for screening patients.**

| <b>Previous regimen</b>   | <b>Replaced regimen</b>                             |
|---------------------------|-----------------------------------------------------|
| ACEIs/ARBs/CCBs           | ½ dose of COVERAM® qd                               |
| ACEIs/ARBs+CCBs           | full dose of COVERAM® qd                            |
| ACEIs/ARBs+CCBs+Diuretics | full dose of COVERAM® qd +full dose of NATRILIX® qd |

Abbreviations: ACEIs, angiotensin converting enzyme inhibitors; ARB, angiotensin receptor blockers; CCBs, calcium channel blockers.

Patients who take more than three types of anti-hypertensive agents will not be screened.
